# Supplementary figures and images for: Neurodevelopmental Outcome of Very Low Birth Weight Infants in the Northern District of Israel: A Cross-Sectional Study
Source: MDPI journal article supplement (doi:10.3390/children10081320), 2023-07-31

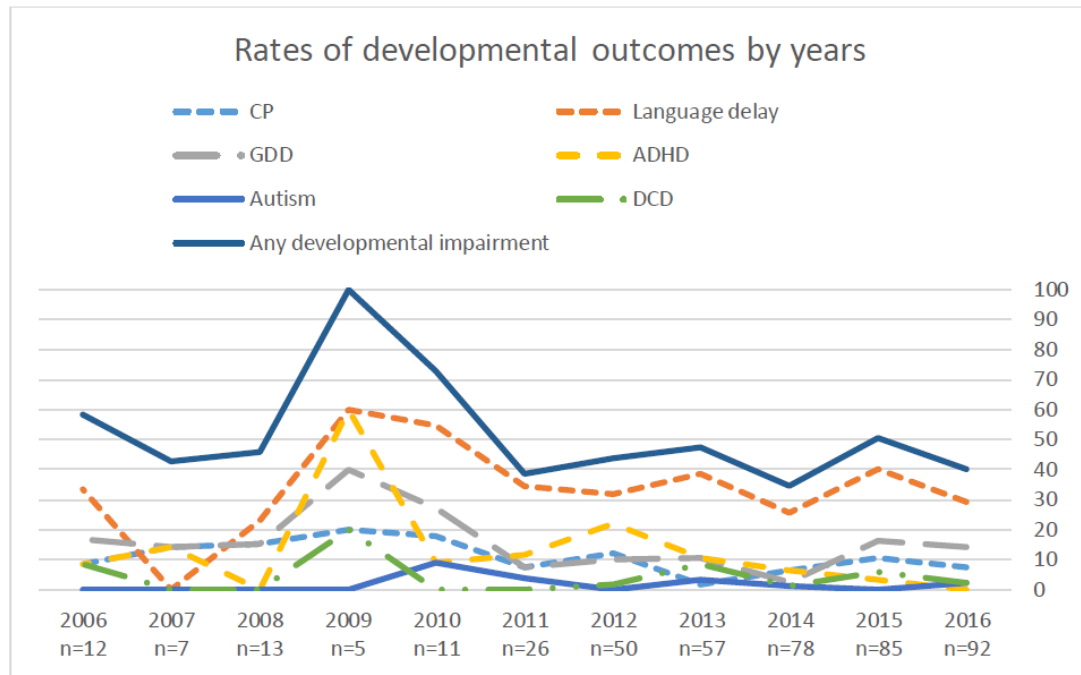

**Figure S1.** Rates of developmental outcomes by years.

Supplement: s1 [file s1]
